# Supplementary material for: Eco-biocompatible periphyton-inhabited polyvinyl chloride (PVC) and polyacrylic acid (PAC) sheets indicate aquaculture bio-sustainability by oxidative stress and steatosis in zebrafish
Source: Royal Society of Chemistry journal article supplement (doi:10.1039/d4su00704b), 2025-01-01
Supplement: d4su00704b1.pdf [file d4su00704b1.pdf]

## Supplementary Information

### **Eco-biocompatible periphyton-inhabited PolyVinyl Chloride (PVC) and PolyAcrylic (PAC) Sheets infer Aquaculture bio-sustainability by oxidative stress and steatosis in zebrafish**

Mitali Sahoo<sup>1,3</sup>, Snehasmita Jena<sup>2</sup>, Shaikh Sheeran Naser<sup>2</sup>, Sudakshya S. Lenka<sup>2</sup>, Adrija Sinha<sup>2</sup>, Aishee Ghosh<sup>2</sup>, Ch. Vinod<sup>1\*</sup>, Suresh K. Verma<sup>2\*</sup>

<sup>1</sup>Life Sciences Research laboratory, School of Applied Sciences, KIIT University, Bhubaneswar 751024, Odisha, INDIA

<sup>2</sup>School of Biotechnology, KIIT University, Bhubaneswar 751024, Odisha, INDIA

<sup>3</sup>Department of Zoology, KISS University, Bhubaneswar, Odisha, India

\* Corresponding author: [vinod.ch22@gmail.com](mailto:vinod.ch22@gmail.com), [sureshverma22@gmail.com](mailto:sureshverma22@gmail.com)

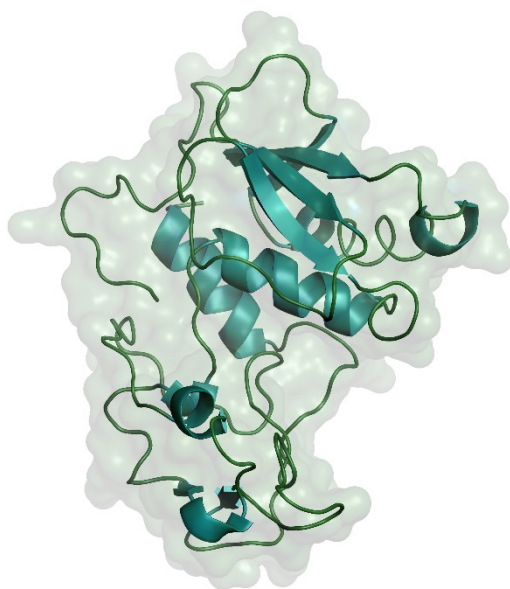

**Figure S1:** Image of Zhe1 protein derived from pdb dataset.

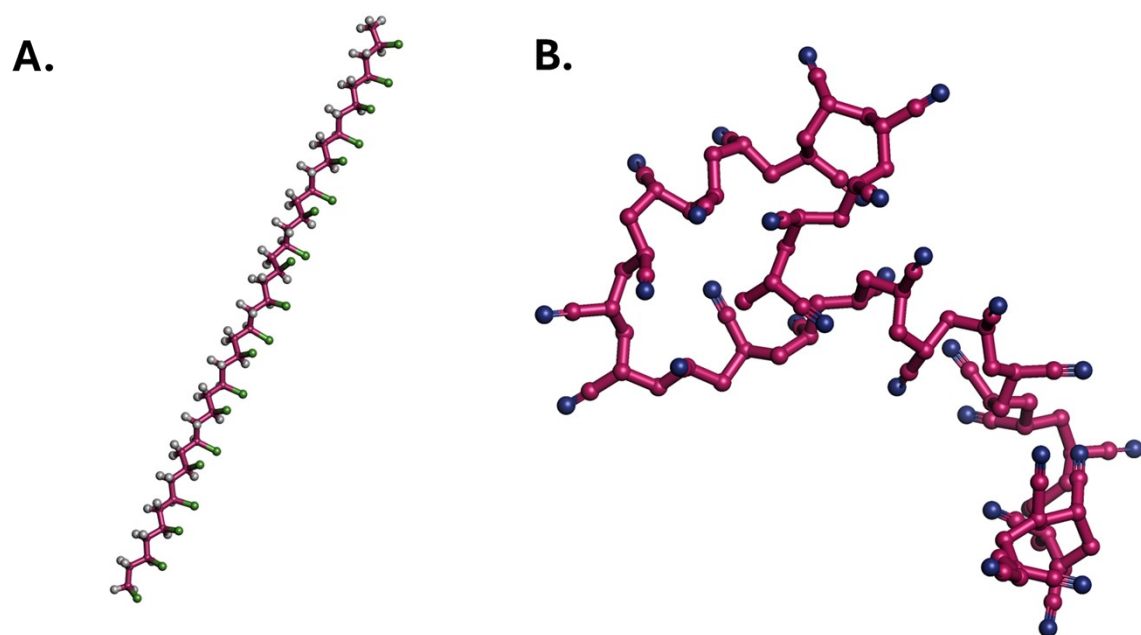

**Figure S2:** Image of (A) PVC (B) PAC derived from pubchem dataset.

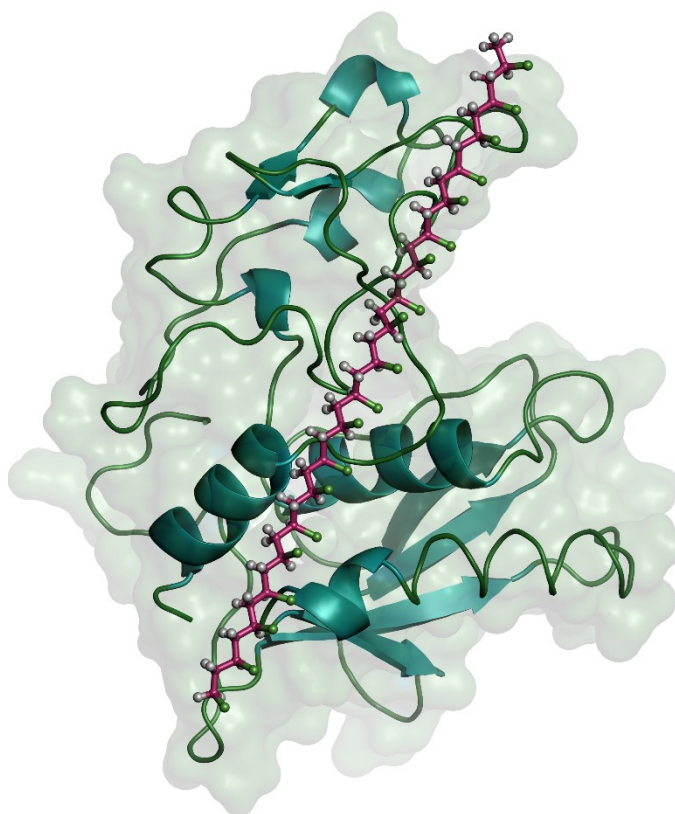

**Figure S3:** Image representing the molecular docking interaction of Zhe1 proteins with PVC.

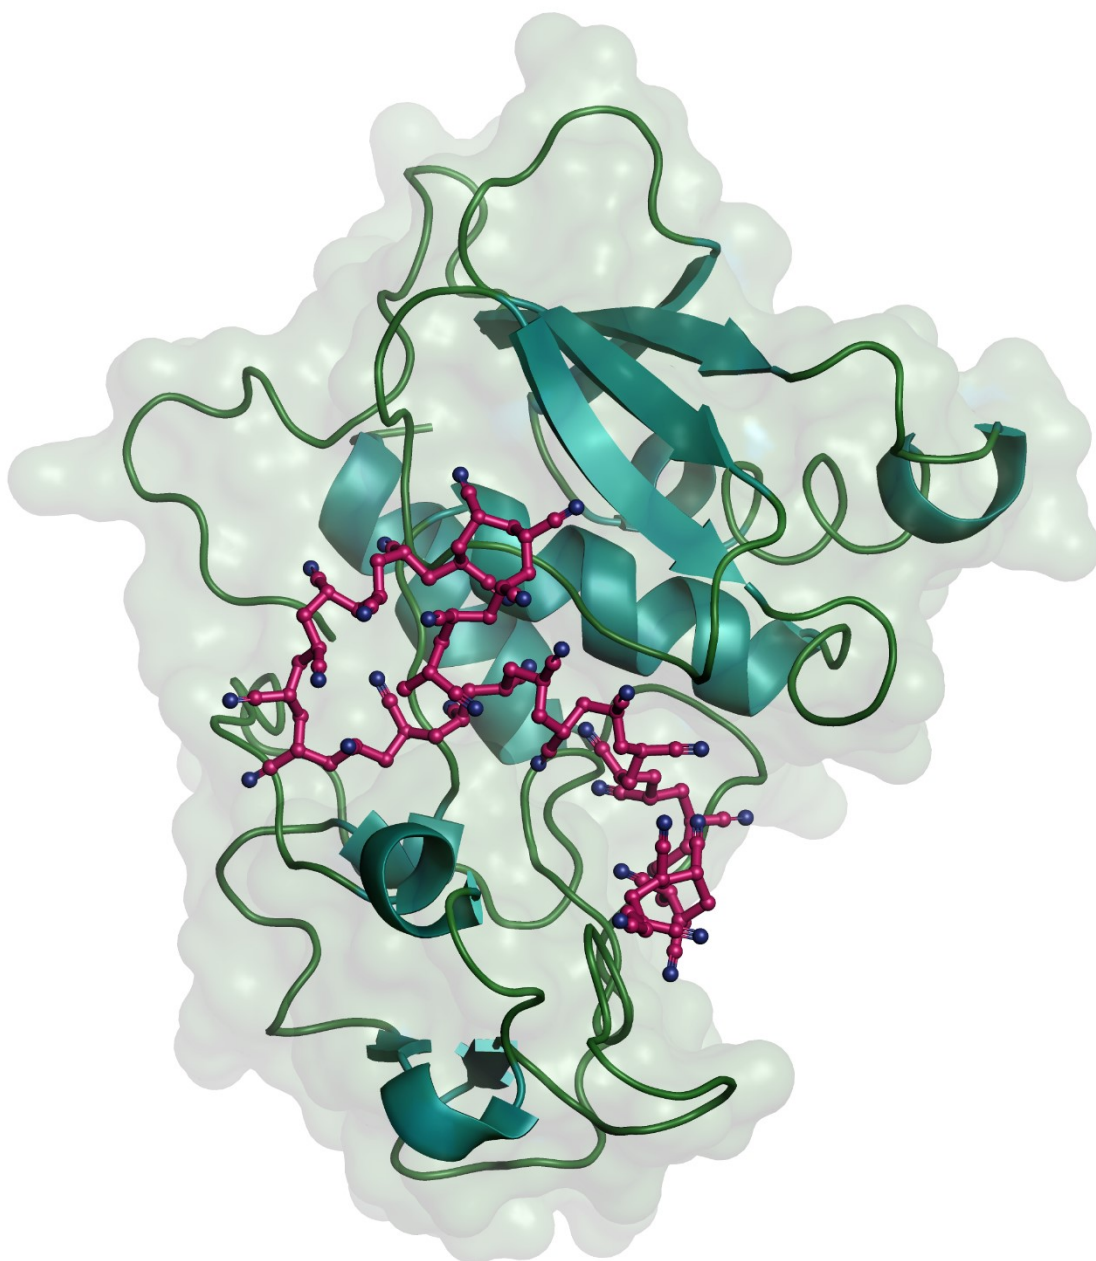

**Figure S4:** Image representing the molecular docking interaction of Zhe1 proteins with PAC.

### zhe1 with PVC Binding affinity (kcal/mol) vs Binding modes

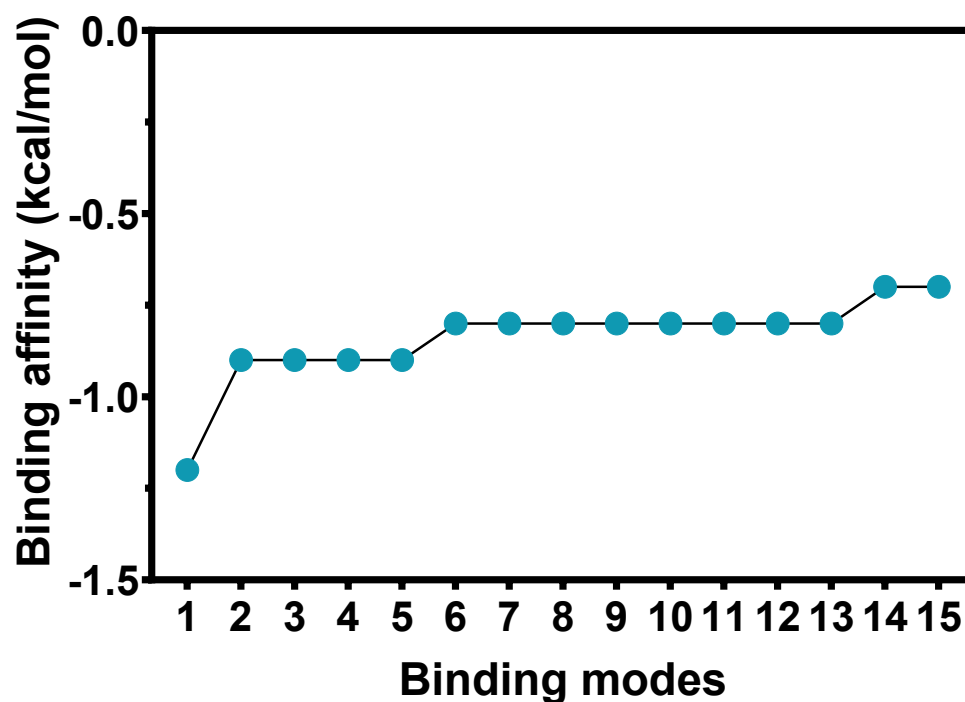

**Figure S5:** Image representing the molecular docking interaction with binding affinity of Zhe1 proteins with PVC.

### zhe1 with PAC Binding affinity (kcal/mol) vs Binding modes

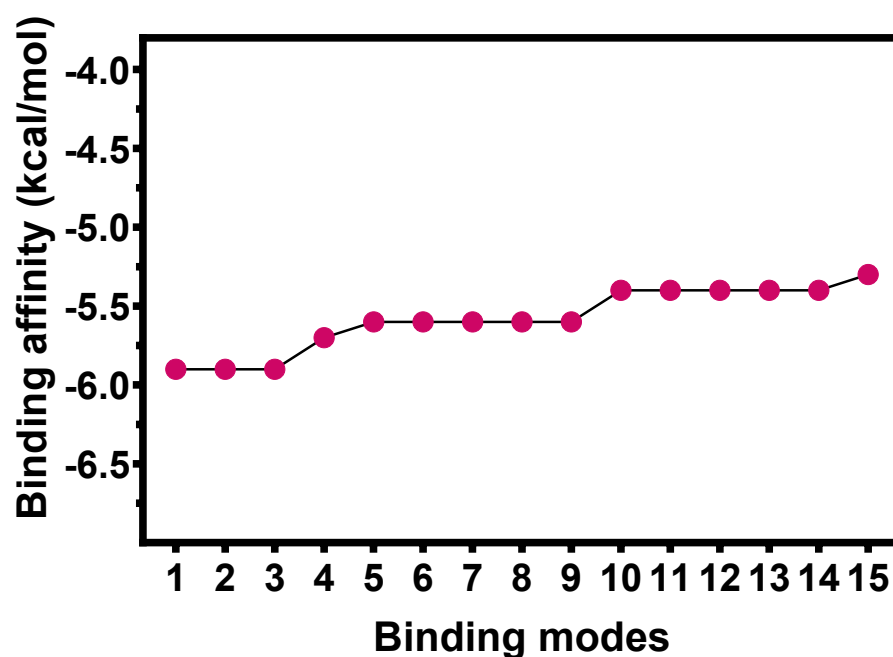

**Figure S6:** Image representing the molecular docking interaction with binding affinity of Zhe1 proteins with PAC.
